# Supplementary material for: Secondary Metabolites of Actinomycetales as Potent Quorum Sensing Inhibitors Targeting Gram-Positive Pathogens: In Vitro and In Silico Study
Source: MDPI journal article supplement (doi:10.3390/metabo12030246), 2022-03-15

## Supporting information

### **Secondary metabolites of actinomycetales as potent quorum sensing inhibitors targeting Gram-positive pathogens; *in vitro* and *in silico* study**

Said E. Desouky <sup>1,2\*</sup>, Mohammed A Abu-Elghait <sup>2</sup>, Eman A. Fayed <sup>3</sup>, Samy Selim <sup>4</sup>, Basit Yousuf <sup>1</sup>, Yasuhiro Igarashi <sup>5</sup>, Basel A. Abdel-Wahab <sup>6,7</sup>, Amnah Mohammed Alsuhaibani <sup>8</sup>, Kenji Sonomoto <sup>1</sup>, Jiro Nakayama <sup>1</sup>

**Table S1. Structures of the selected compounds.**

Fistupyrone

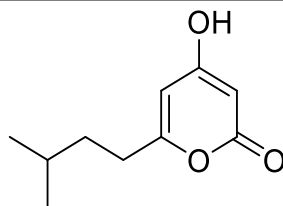

Lydicamycin

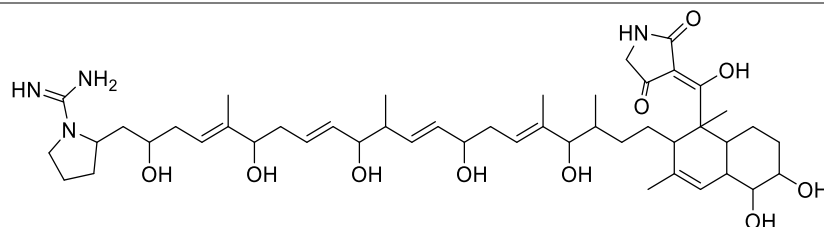

Watasemycin A

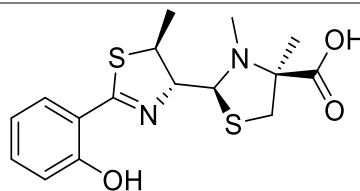

Rebeccamycin

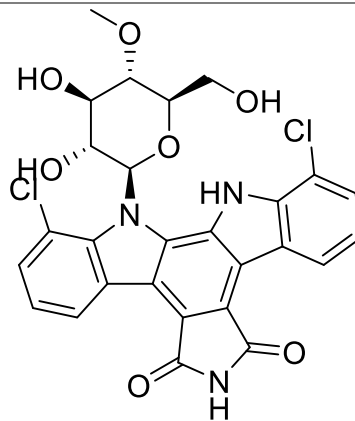

Nocardimicin H

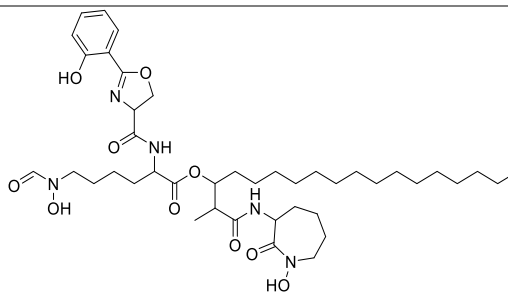

Rishirilide A

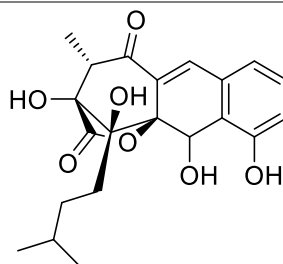

Lupinacidin C



The chemical structure of Lupinacidin C is a dimeric naphthoquinone. It consists of two naphthoquinone units linked at their 2-positions. The left unit has a hydroxyl group at the 6-position. The right unit has hydroxyl groups at the 6 and 8 positions, a methyl group at the 7-position, and a 3-methylbutyl side chain at the 1-position. The 3-methylbutyl side chain is shown with a wedge bond to the chiral carbon, indicating its stereochemistry.

CC(C)CC[C@@H]1C=C2C(=C1)C(=O)C(=C2C3=CC=CC=C3C(=O)C4=CC=CC=C4O)O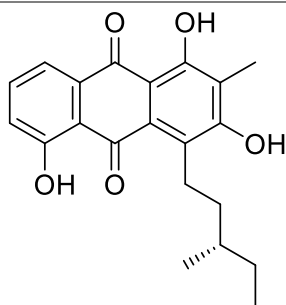

Rakicidin A

Chemical structure of Rakicidin A, a complex macrocyclic compound. The structure features a large 14-membered ring system containing multiple amide and ester linkages. A long, branched alkyl chain is attached to the ring, and a side chain with a hydroxyl group and an amide group is also present.

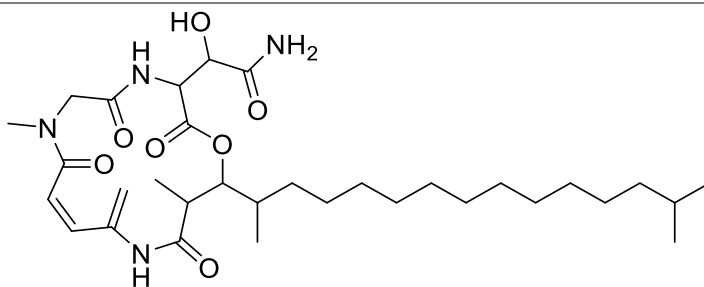

Rakicidin B

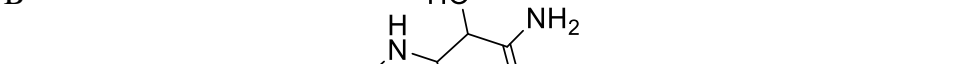

The chemical structure of Rakicidin B is a complex macrocyclic compound. It features a central 12-membered ring with a methyl group on one nitrogen atom. Attached to this ring are several side chains, including a long branched alkyl chain, a hydroxyl group, and an amide group. The structure is drawn in a skeletal format with explicit hydrogen atoms and lone pairs.

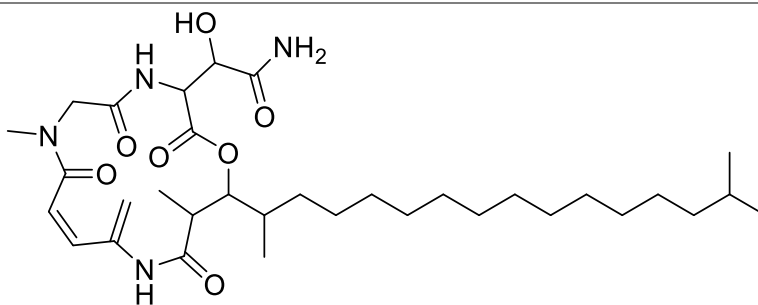

Phenalinolactone

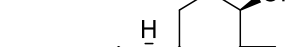

The chemical structure of Phenalinolactone is a complex polycyclic molecule. It features a phenanthrene-like core with a lactone ring fused to the C-10 and C-11 positions. The structure includes a methyl group at C-1, a hydroxyl group at C-13, and a carboxylic acid group at C-14. The stereochemistry is indicated by wedged and dashed bonds.

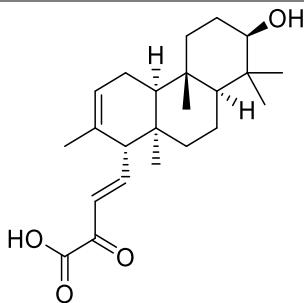

Myxochelinamide



The chemical structure of Myxochelinamide is a symmetrical molecule. It features a central pentamethylene chain (-(CH<sub>2</sub>)<sub>5</sub>-) connecting two identical 2,4-dihydroxybenzoyl groups. Each benzoyl group is attached to the chain via an amide bond (-NH-CO-). The benzene rings are substituted with hydroxyl groups at the 2 and 4 positions. The stereochemistry at the chiral center of the amide linkage is indicated as (S) with a wedge bond to the hydrogen atom.

Oc1cc(O)cc(cc1C(=O)N[C@H](CCCCN[C@@H](C(=O)c2cc(O)cc(O)c2)C)C)C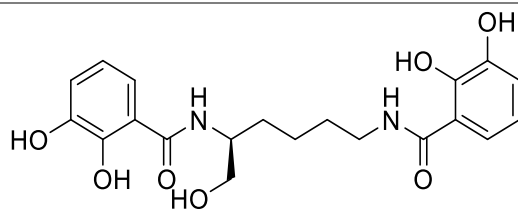

Pristinamycin IIA

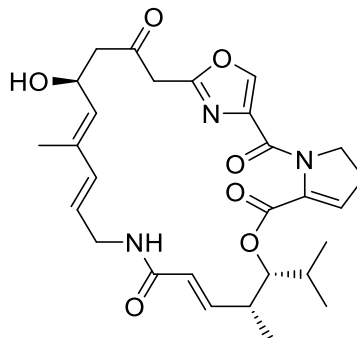

Pyridoxatin

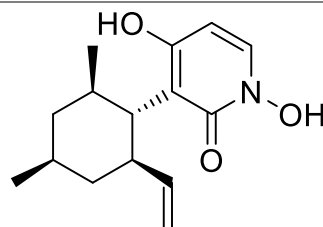

291-46

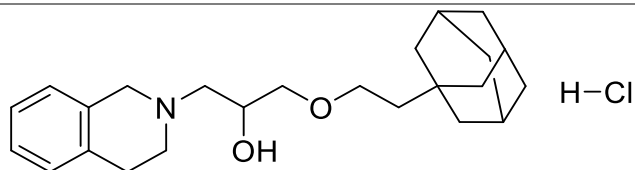

Preussin

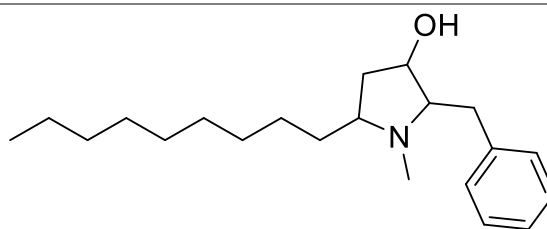

CHI15B  
(Tetrangulol)

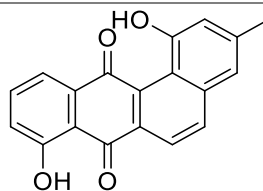

BU4664LAc

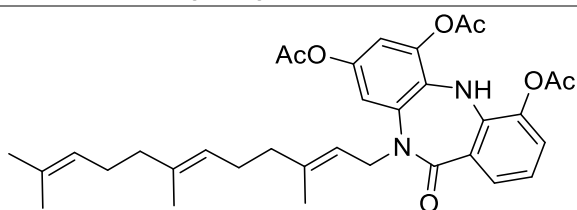

BU4664lMe

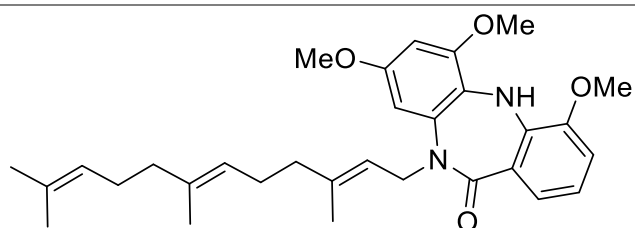

BU4664L

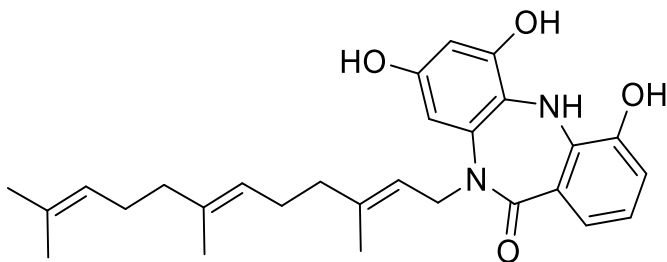

HF599 (maleimide)

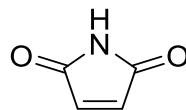

Abyssomicin I

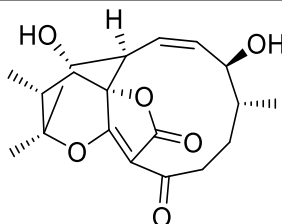

Sporogen AO-1

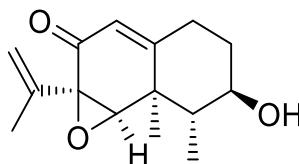

Mycolic acid

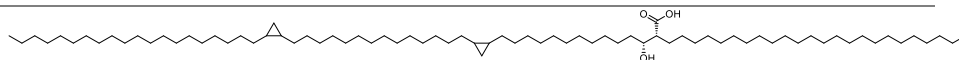

Chromone

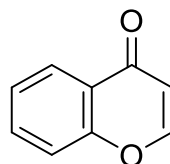

mucidone

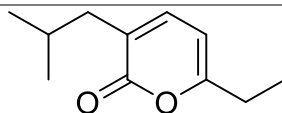

Furanone

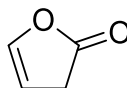

Maklamicin

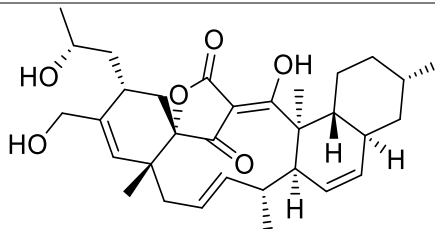

Coumarine

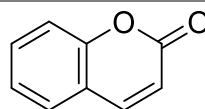

Collismycin

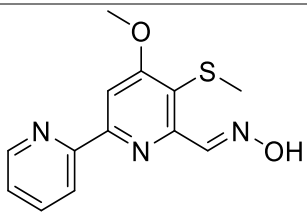

Borrelidin

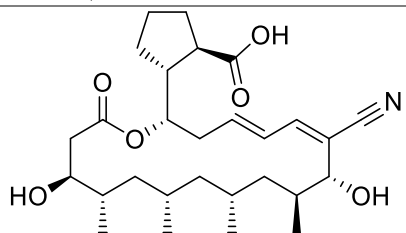

Radicicol

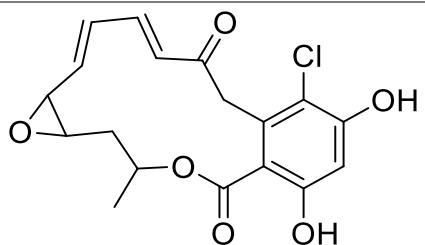

Decatromicin A

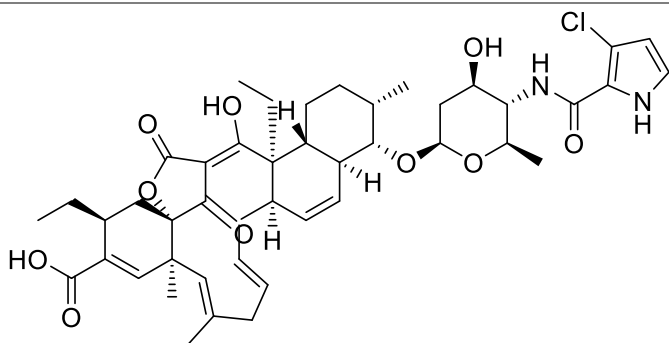

Decatromicin B

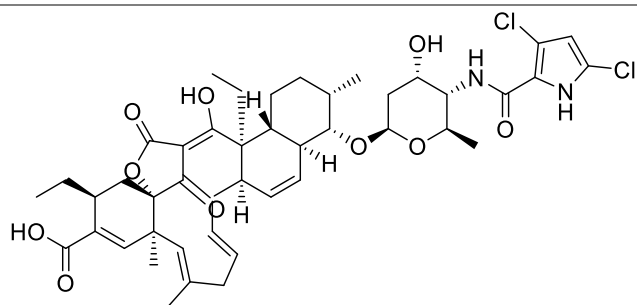

SEK34

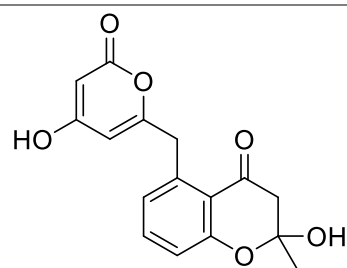

---

SEK34B

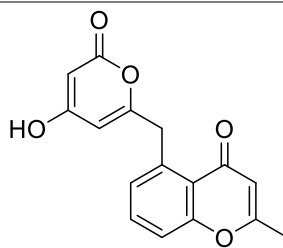

---

Lysolipin I

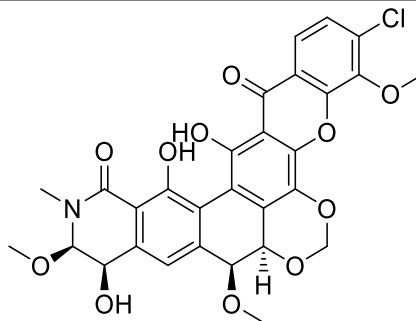

---

Geldanamycin

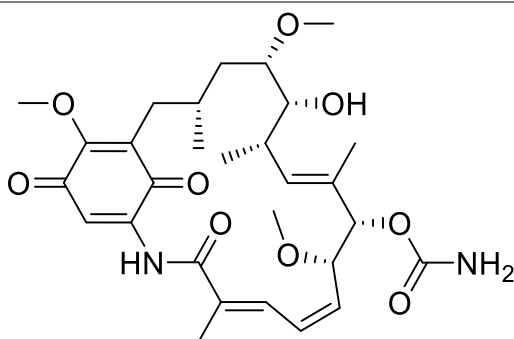

---

Enterocin

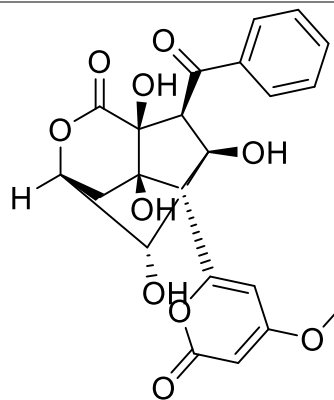

---

Questinomycin A

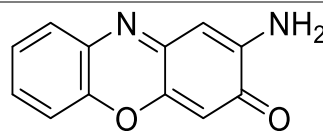

Pradimicin S

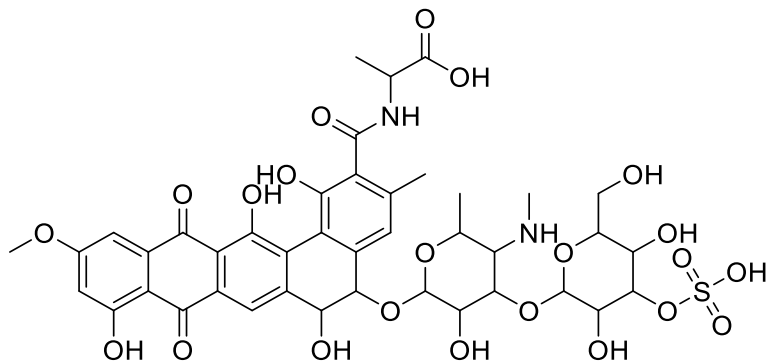

Synerazol

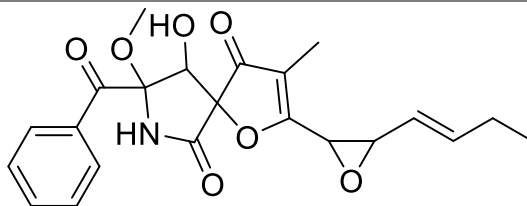

Pseurotin A

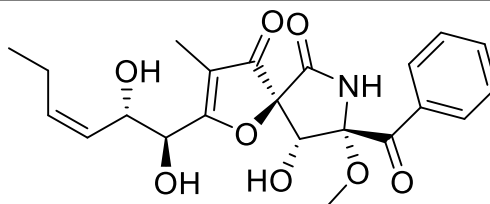

Okilactomycin

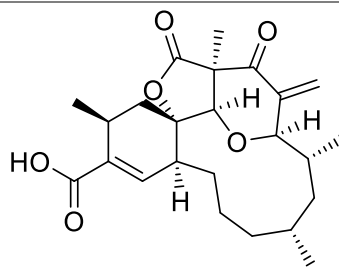

Leptomycin A

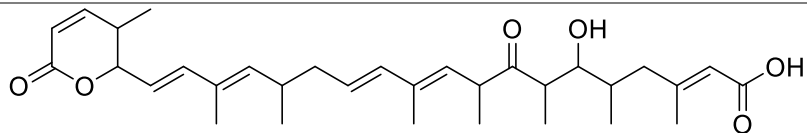

Supplement: s1 [file s1]
